# Supplementary material
Source: bioRxiv or medRxiv preprint supplement (https://medrxiv.org/highwire/filestream/79522/field_highwire_adjunct_files/0/2020.04.09.20058651-1.pdf)
Supplement: Supplementary file [file 2020.04.09.20058651-1.pdf]

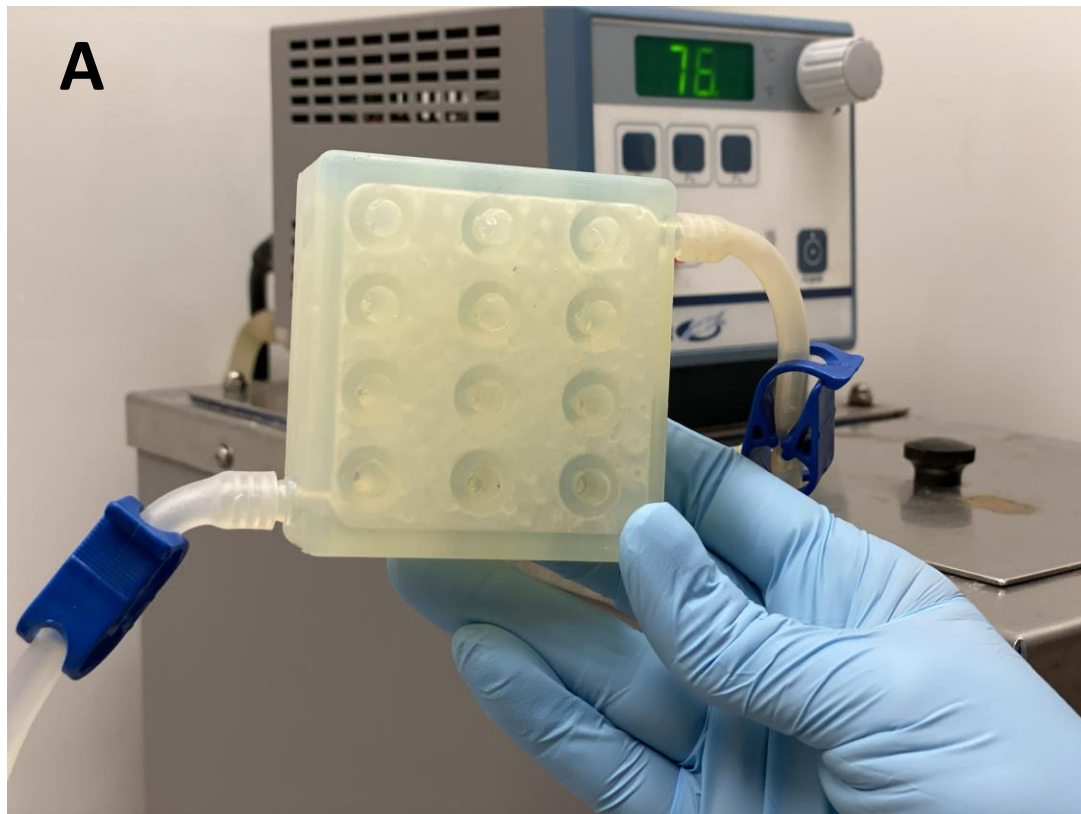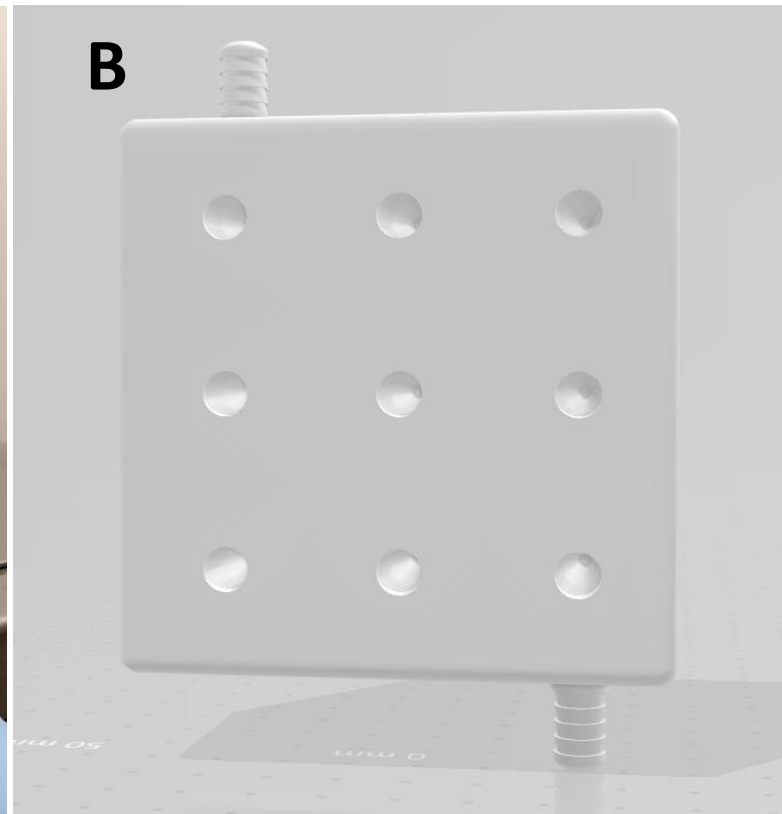

**Supplementary Figure 1**

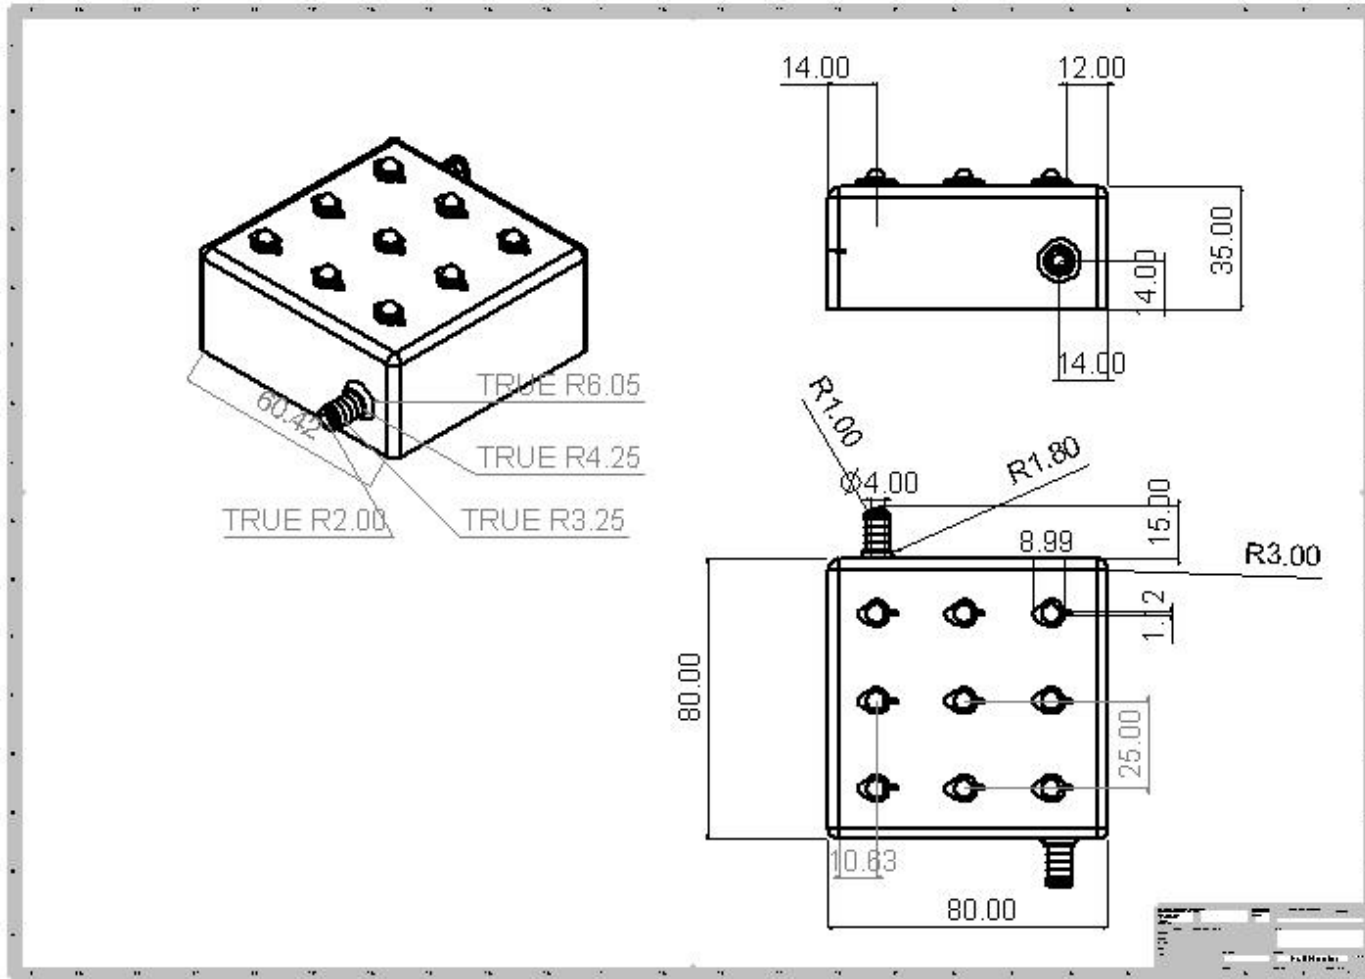

Supplementary Figure 2

# Positive Control: 2019-nCoV\_N

Created with SnapGene®

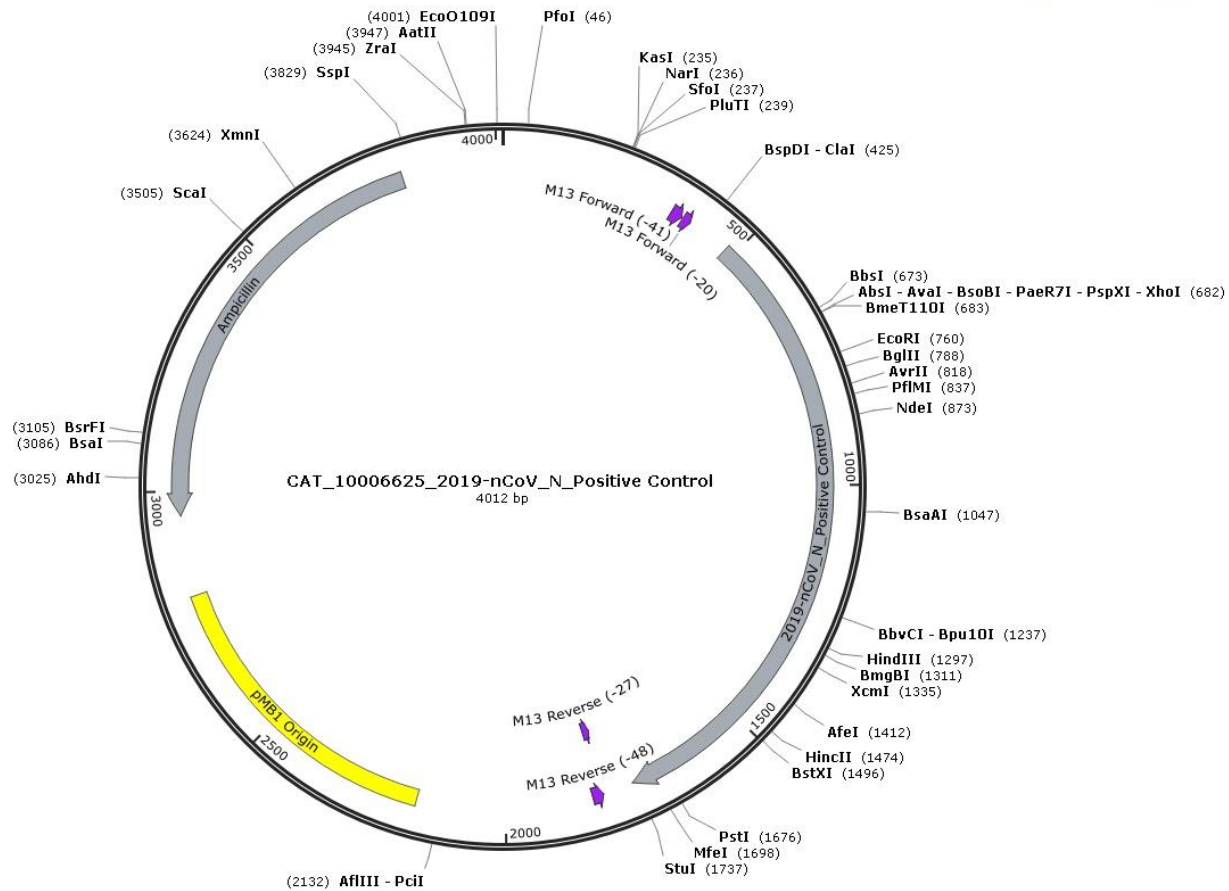

Supplementary Figure 3

# Negative Control: GP EBOV

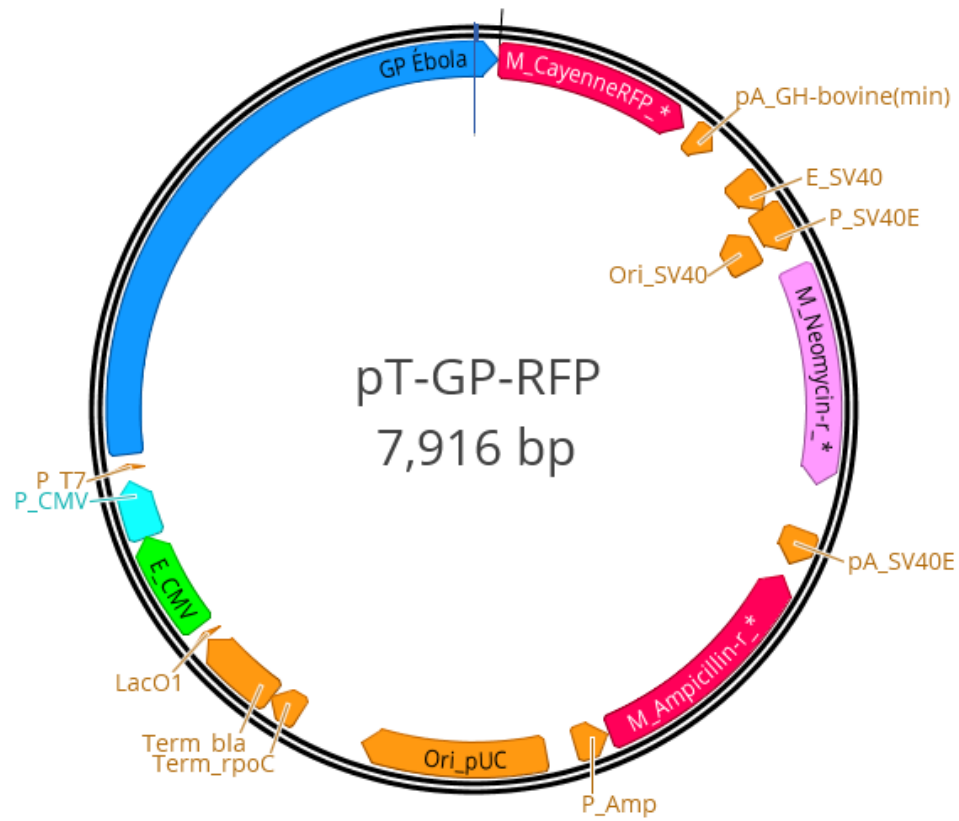

Supplementary Figure 4

**A**

Set  $\alpha$

Set  $\beta$

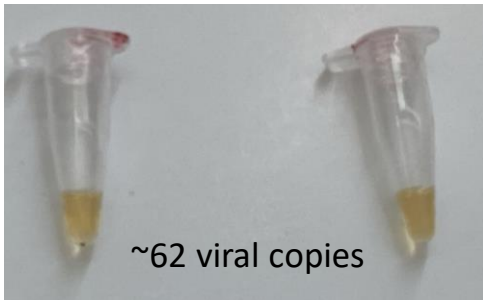

**B**

Storage temperature

4 °C

20 °C

Storage time (days)

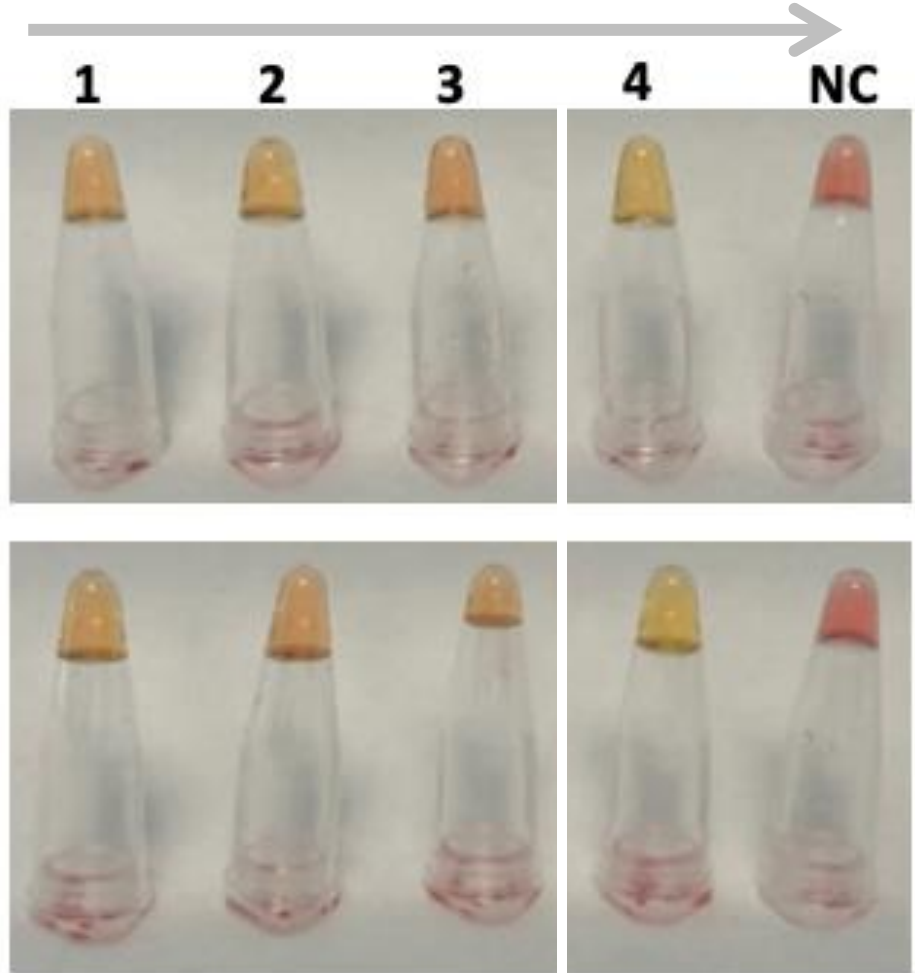

Supplementary Figure 5

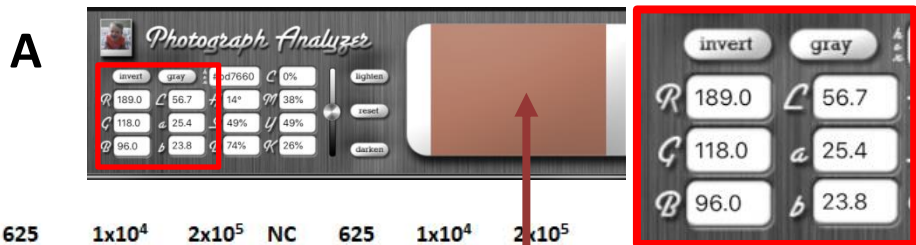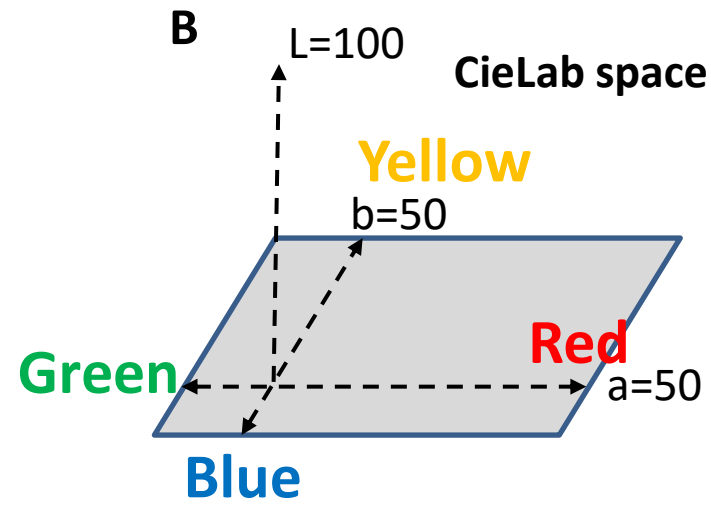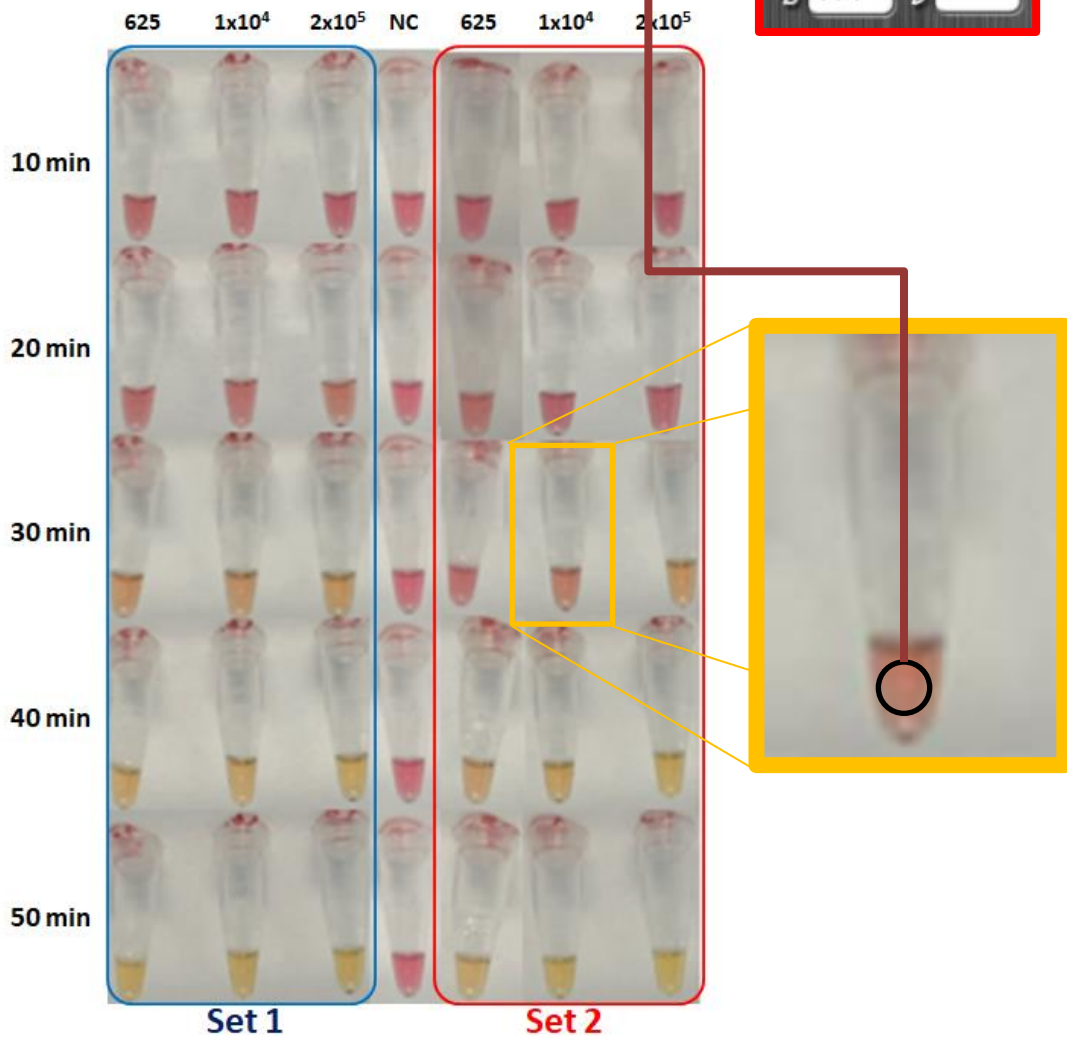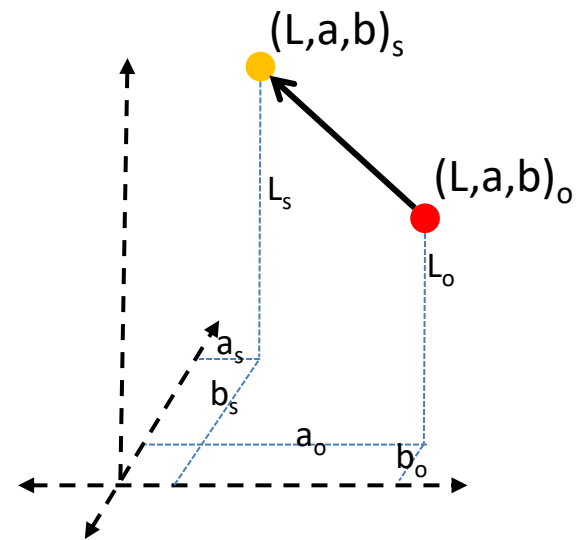

Supplementary Figure 6

**A**

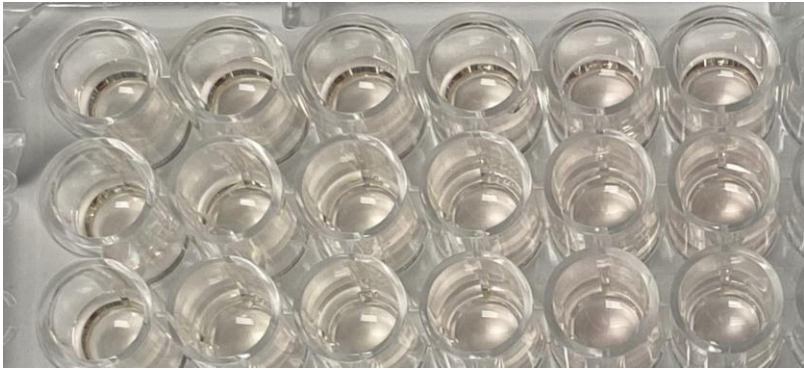

**B**

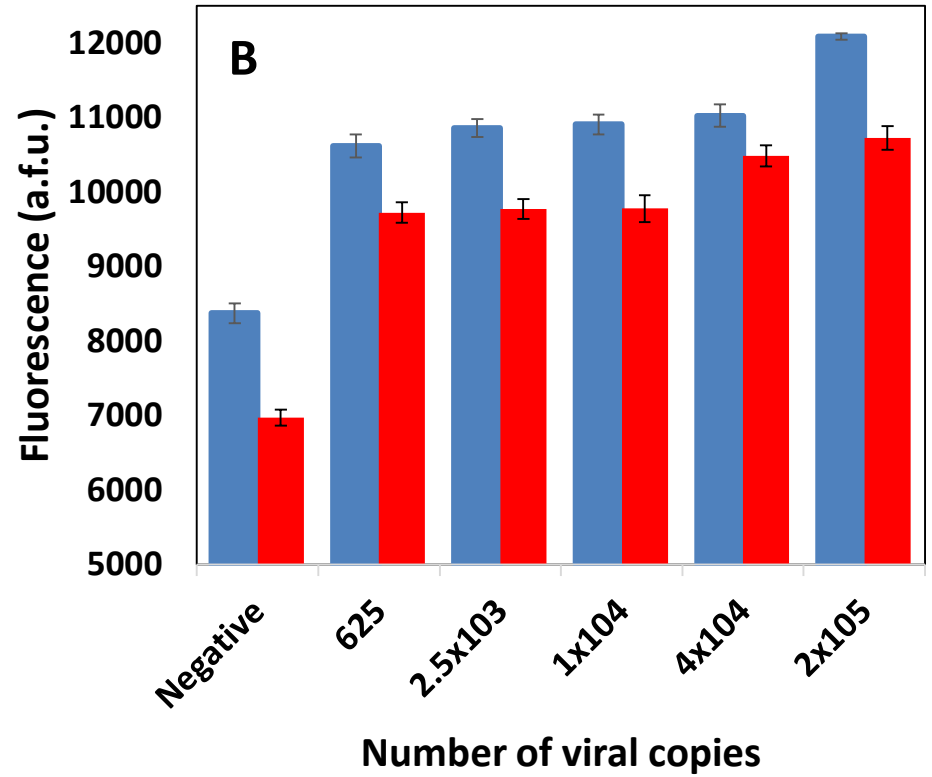

**Supplementary Figure 7**
